# Supplementary material for: Effects of Activity Tracker-Based Counselling and Live-Web Exercise on Breast Cancer Survivors during Italy COVID-19 Lockdown
Source: J Funct Morphol Kinesiol. 2021 Jun 9;6(2):50. doi: 10.3390/jfmk6020050 (PMC8293416; doi:10.3390/jfmk6020050)
Supplement: Supplementary file 1 [file jfmk-06-00050-s001.zip]

Archive with 15 entries (12 files):
- Supplementary figures/
- Supplementary figures/Figure S1.pdf
- __MACOSX/
- __MACOSX/Supplementary figures/
- __MACOSX/Supplementary figures/._Figure S1.pdf
- Supplementary figures/Figure S2.pdf
- __MACOSX/Supplementary figures/._Figure S2.pdf
- Supplementary figures/Figure S3.pdf
- __MACOSX/Supplementary figures/._Figure S3.pdf
- Supplementary figures/Figure S6.pdf
- __MACOSX/Supplementary figures/._Figure S6.pdf
- Supplementary figures/Figure S4.pdf
- __MACOSX/Supplementary figures/._Figure S4.pdf
- Supplementary figures/Figure S5.pdf
- __MACOSX/Supplementary figures/._Figure S5.pdf
